# Supplementary material for: Multi-target amyloid probing and inhibition using basic orange fluorescence
Source: Royal Society of Chemistry journal article supplement (doi:10.1039/d3sd00124e), 2023-01-01
Supplement: d3sd00124e1.pdf [file d3sd00124e1.pdf]

## Supporting Information

### Multi-Target Amyloid Probing and Inhibition Using Basic Orange Fluorescence

Yijing Tang<sup>1</sup>, Dong Zhang<sup>1</sup>, Xiong Gong<sup>2</sup>, and Jie Zheng<sup>1\*</sup>

<sup>1</sup>Department of Chemical, Biomolecular, and Corrosion Engineering  
The University of Akron, Ohio, USA

<sup>2</sup>School of Polymer Science and Polymer Engineering  
The University of Akron, Ohio, USA

\* Corresponding author: [zhengj@uakron.edu](mailto:zhengj@uakron.edu)

**Table S1. Comparison of typical amyloid probes and inhibitors in terms of their  $K_D$  value and relative inhibited fibrillization rate**

|                                  |                     | Entry | Detectors/<br>Modulators                   | Target                                                                                                                     | Binding<br>affinity/Sensitivity<br>( $\mu$ M) | Inhibition<br>rate (%) | Ref.  |
|----------------------------------|---------------------|-------|--------------------------------------------|----------------------------------------------------------------------------------------------------------------------------|-----------------------------------------------|------------------------|-------|
| Single<br>function-<br>detectors | Single-<br>targeted | 1     | PicoGreen                                  | insulin                                                                                                                    | $\sim$ 38.5                                   | -                      | 1     |
|                                  |                     | 2     | stryl-11                                   | insulin                                                                                                                    | 20                                            | -                      | 2     |
|                                  |                     | 3     | Thienoquinoxaline                          | A $\beta$                                                                                                                  | 0.077                                         | -                      | 3     |
|                                  |                     | 4     | styryl-quinoxaline (SQ)                    | A $\beta$                                                                                                                  | 0.294                                         | -                      | 3     |
|                                  |                     | 5     | L1                                         | A $\beta$                                                                                                                  | -                                             | -                      | 4     |
|                                  |                     | 6     | L2                                         | A $\beta$                                                                                                                  | -                                             | -                      | 4     |
|                                  |                     | 7     | L3                                         | A $\beta$                                                                                                                  | -                                             | -                      | 4     |
|                                  |                     | 8     | Mu1                                        | A $\beta$                                                                                                                  | 90.91                                         | -                      | 5     |
|                                  |                     | 9     | 4b                                         | A $\beta$                                                                                                                  | 0.0085                                        | -                      | 6     |
|                                  |                     | 10    | ANCA                                       | A $\beta$                                                                                                                  | 1.4-13.8 (6)                                  | -                      | 7     |
|                                  | Multi-<br>targeted  | 11    | Thioflavin T (ThT)                         | A $\beta$ ,<br>hIAPP,<br>hCT, $\alpha$ -<br>syn, etc                                                                       | $\sim$ 0.58                                   | -                      | 8,9   |
|                                  |                     | 12    | 1-anilino-8-naphthalene<br>sulfonate (ANS) | A $\beta$ ,<br>hIAPP,<br>hCT, $\alpha$ -<br>syn, etc                                                                       | -                                             | -                      | 8     |
|                                  |                     | 13    | Benzothiazole aniline (BTA)                | A $\beta$ , tau                                                                                                            | $\sim$ 0.02                                   | -                      | 10    |
|                                  |                     | 14    | auramine-O (AuO)                           | BSA,<br>insulin                                                                                                            | $\sim$ 1.12                                   | -                      | 11,12 |
|                                  |                     | 15    | PD-NA                                      | A $\beta$ ,<br>HEWL                                                                                                        | -                                             | -                      | 13    |
|                                  |                     | 16    | PD-NA-TEG                                  | A $\beta$ ,<br>HEWL                                                                                                        | -                                             | -                      | 13    |
|                                  |                     | 17    | TPE-TPP                                    | A $\beta$ , $\alpha$ -syn,<br>$\alpha$ -LA,<br>HEWL,<br>$\kappa$ -casein,<br>D76N $\beta$ 2m,<br>$\alpha$ B-<br>Crystallin | 4.36-8.93                                     | -                      | 14-16 |
| Single<br>function-<br>inhibitor | Single-<br>targeted | 18    | melatonin                                  | hIAPP                                                                                                                      | -                                             | 27                     | 17    |
|                                  |                     | 19    | fisetin                                    | hIAPP                                                                                                                      | -                                             | 23                     | 17    |
|                                  |                     | 20    | azadirachtin                               | hIAPP                                                                                                                      | -                                             | $\sim$ 100             | 18    |
|                                  |                     | 21    | organofluorine                             | A $\beta$                                                                                                                  | -                                             | 20-96                  | 19    |
|                                  |                     | 22    | Glyburide                                  | hIAPP                                                                                                                      | -                                             | 47                     | 20    |
|                                  |                     | 23    | repaglinide                                | hIAPP                                                                                                                      | -                                             | 49                     | 20    |
|                                  |                     | 24    | troglitazone                               | hIAPP                                                                                                                      | -                                             | 90                     | 20    |

|                |                                        |                 |                                                      |                                            |            |          |                 |
|----------------|----------------------------------------|-----------------|------------------------------------------------------|--------------------------------------------|------------|----------|-----------------|
| Multi-targeted | 25                                     | EGCG            | A $\beta$ , $\alpha$ -syn, tau, TTR, Htt, hCT, hIAPP | -                                          | 77-100     | 21-24    |                 |
|                | 26                                     | Genistein       | A $\beta$ , hIAPP                                    | -                                          | 40-63      | 25       |                 |
|                | 27                                     | Resveratrol     | A $\beta$ , hIAPP                                    | -                                          | 88         | 26       |                 |
|                | 28                                     | Vitamin k3      | HEWL, A $\beta$                                      | -                                          | 77-81      | 27       |                 |
|                | 29                                     | morin           | A $\beta$ , hIAPP, insulin                           | -                                          | ~100       | 28-30    |                 |
|                | 30                                     | quercetin       | A $\beta$ , hIAPP, $\alpha$ -syn, tau                | -                                          | ~100       | 28,31-33 |                 |
|                | 31                                     | myricetin       | A $\beta$ , hIAPP, $\alpha$ -syn, tau                | -                                          | ~100       | 28,34-36 |                 |
|                | 32                                     | rutin           | A $\beta$ , hIAPP                                    | -                                          | ~100       | 37-39    |                 |
|                | 33                                     | curcumin        | A $\beta$ , hIAPP, $\alpha$ -syn, PrP, TTR           | -                                          | ~100       | 23,40-44 |                 |
|                | 34                                     | silibinin       | A $\beta$ , hIAPP                                    | -                                          | 49-70      | 20,45    |                 |
|                | 35                                     | caffeine        | A $\beta$ , hIAPP                                    | -                                          | 28         | 46,47    |                 |
|                | Dual function-detectors and modulators | Single-targeted | 36                                                   | BSPOTPE                                    | A $\beta$  | -        | ~100            |
| Multi-targeted |                                        | 37              | Congo red                                            | A $\beta$ , hIAPP, hCT, $\alpha$ -syn, etc | 0.1-1.1    | -        | 49,50           |
|                |                                        | 38              | Basic orange 21 (BO21)                               | A $\beta$ , hIAPP, hCT, $\alpha$ -syn      | 0.015-0.24 | ~100     | 51<br>This work |

**Table S2. Summary of fluorescence spectroscopic titration**

|                  | Linear range<br>( $\mu\text{M}$ ) | Linear function        | $R^2$  | $K_D$ (nM) |
|------------------|-----------------------------------|------------------------|--------|------------|
| mA $\beta$ -BO21 | 0.625-40                          | $y = 0.3853x + 0.013$  | 0.9502 | 34         |
| oA $\beta$ -BO21 | 2.5-40                            | $y = 0.4546x + 0.0067$ | 0.9868 | 15         |
| fA $\beta$ -BO21 | 0.625-40                          | $y = 0.0682x + 0.0095$ | 0.9555 | 139        |
| mhIAPP-BO21      | 0.625-40                          | $y = 2.029x + 0.094$   | 0.9786 | 46         |
| ohIAPP-BO21      | 1.25-40                           | $y = 0.1771x + 0.0032$ | 0.9994 | 18         |
| fhIAPP-BO21      | 2.5-40                            | $y = 0.0539x + 0.0062$ | 0.9742 | 115        |
| mhCT-BO21        | 0.625-40                          | $y = 0.1786x + 0.0051$ | 0.9945 | 29         |
| ohCT-BO21        | 5-40                              | $y = 0.0832x + 0.003$  | 0.9935 | 36         |
| fhCT-BO21        | 2.5-40                            | $y = 0.4642x + 0.1113$ | 0.9810 | 240        |

**Table S3. Detection limits of BO21 and ThT for different amyloid peptides**

|                          | A $\beta$ -BO21 | hIAPP-BO21 | hCT-BO21 | A $\beta$ -ThT | hIAPP-ThT | hCT-ThT |
|--------------------------|-----------------|------------|----------|----------------|-----------|---------|
| $\delta$                 | 5.512           | 9.247      | 9.851    | 32.94          | 77.18     | 116.8   |
| K ( $\mu\text{M}^{-1}$ ) | 111.8           | 142.2      | 110      | 185.3          | 577.5     | 127.5   |
| DL ( $\mu\text{M}$ )     | 0.1479          | 0.1951     | 0.2687   | 0.5333         | 0.4009    | 2.7482  |
| R <sup>2</sup>           | 0.9852          | 0.9745     | 0.9528   | 0.8365         | 0.9005    | 0.1616  |

The detection limits (DL) were estimated based on the  $3\delta/k$  method.

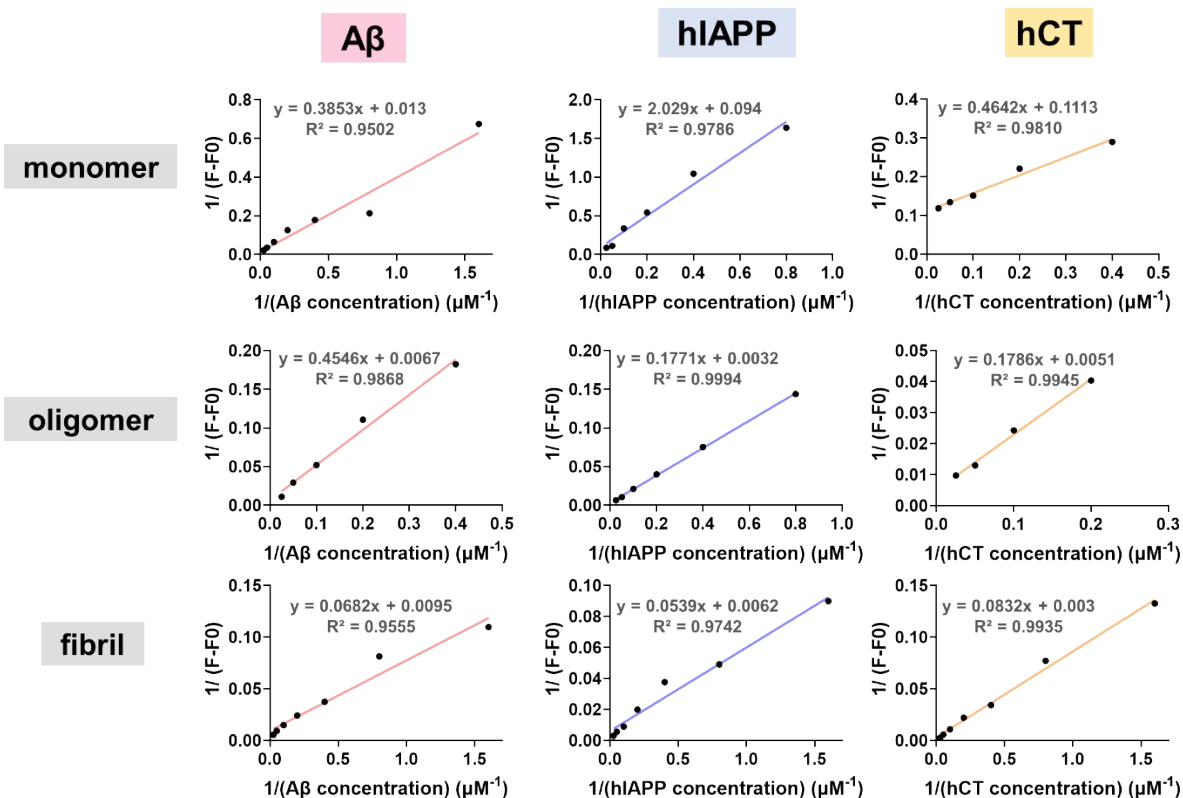

**Figure S1.** Linear fitting analysis of fluorescence spectroscopic titration shown in **Fig. 3a** using  $1/(F_t - F_0) = 1/(F_{max} - F_0) + 1/((F_{max} - F_0) \cdot K_D \cdot [X])$ . 1  $\mu$ M BO21 was added as the increased concentrations (0-40  $\mu$ M) of monomeric (1<sup>st</sup> row), oligomeric (2<sup>nd</sup> row) and fibrillar (3<sup>rd</sup> row) aggregates of A $\beta$  (1<sup>st</sup> column), hIAPP (2<sup>nd</sup> column), and hCT (3<sup>rd</sup> column) under excitation of 470 nm.

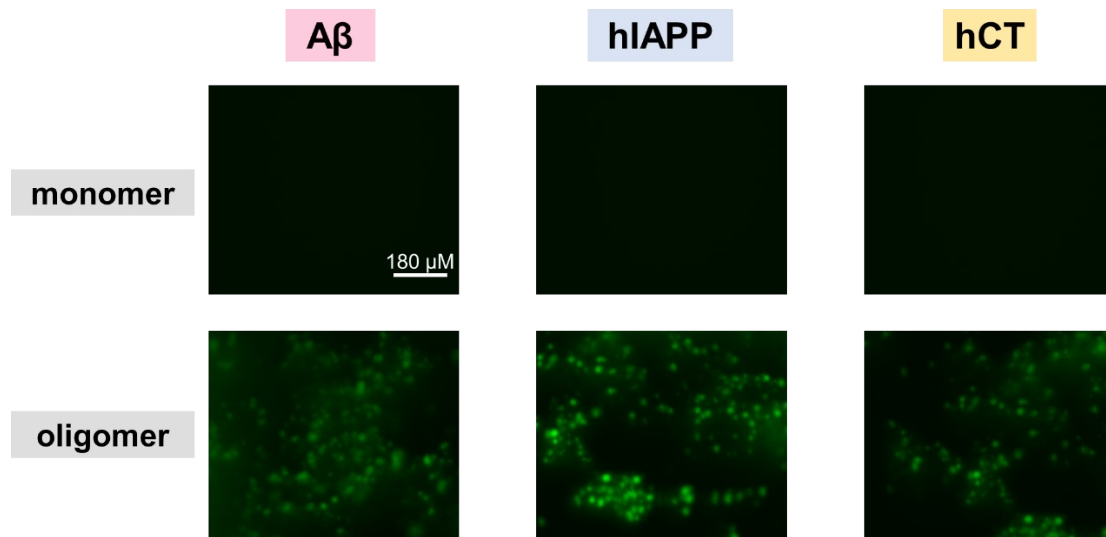

**Figure S2.** Fluorescence image of amyloid monomers (1st row) and oligomers (2nd row) stained by BO21.

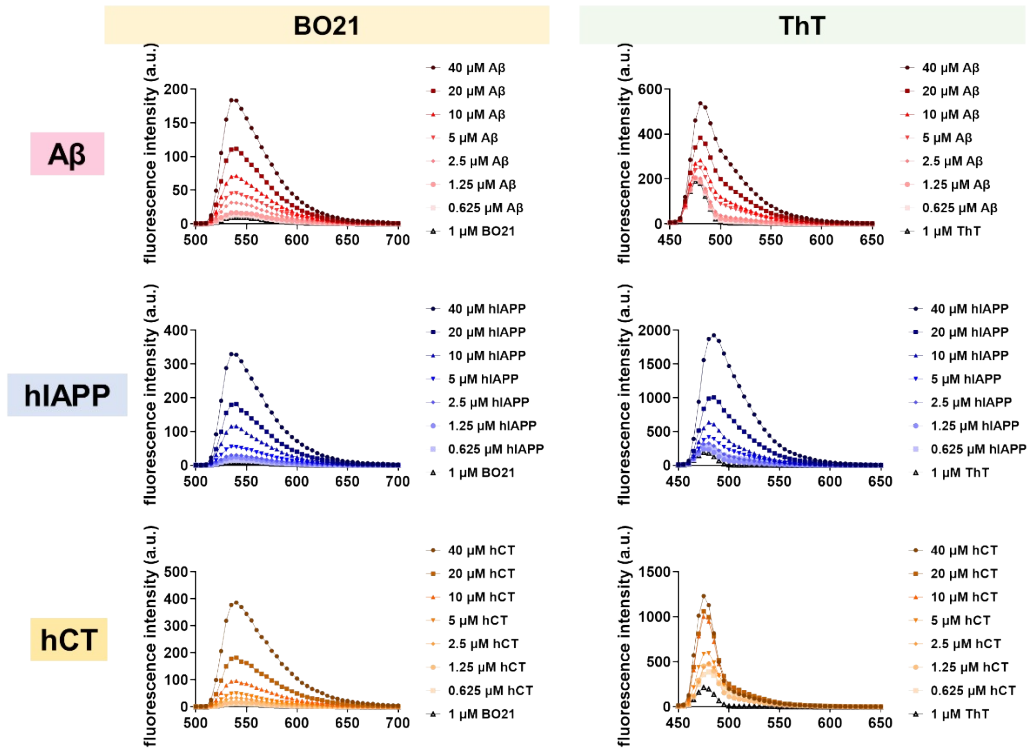

**Figure S3.** Fluorescence spectra of 1  $\mu\text{M}$  BO21 (1st column) and ThT (2nd column) in the presence (colored) and absence (black) of fibrillar aggregates of A $\beta$  (1st row), hIAPP (2nd row), and hCT (3rd row).



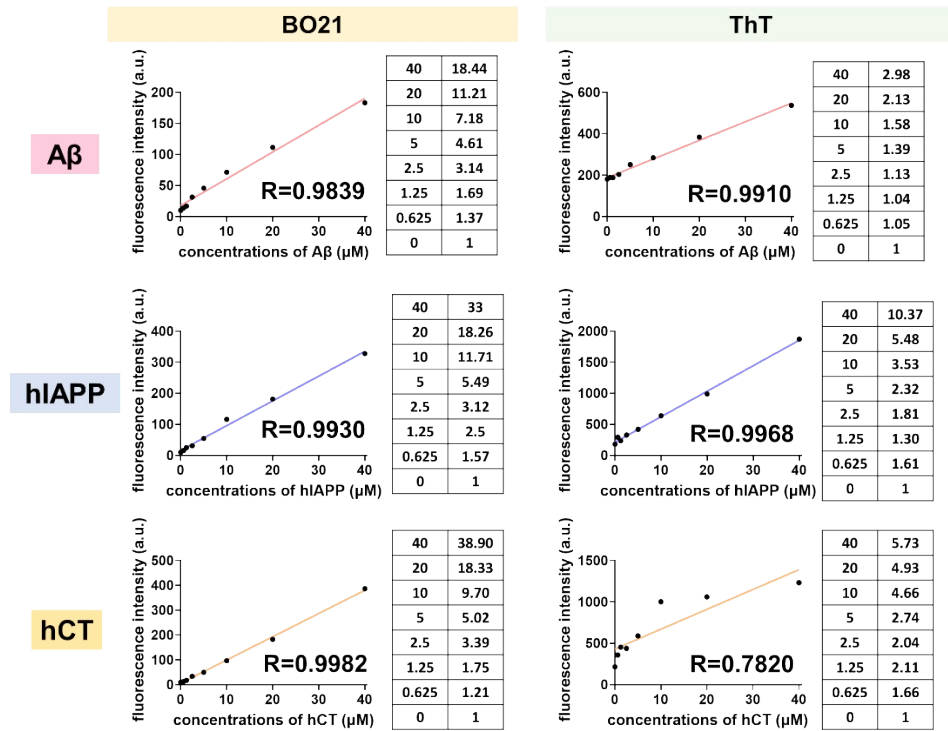

**Figure S4.** Linear fitting analysis of fluorescence intensity and corresponding signal/noise ratio of using 1 μM BO21 (1<sup>st</sup> column) and ThT (2<sup>nd</sup> column) as probe to detect increasing concentrations (0-40 μM) of fibrillar aggregates of Aβ (1<sup>st</sup> row), hIAPP (2<sup>nd</sup> row), and hCT (3<sup>rd</sup> row) under excitation of 470 nm.

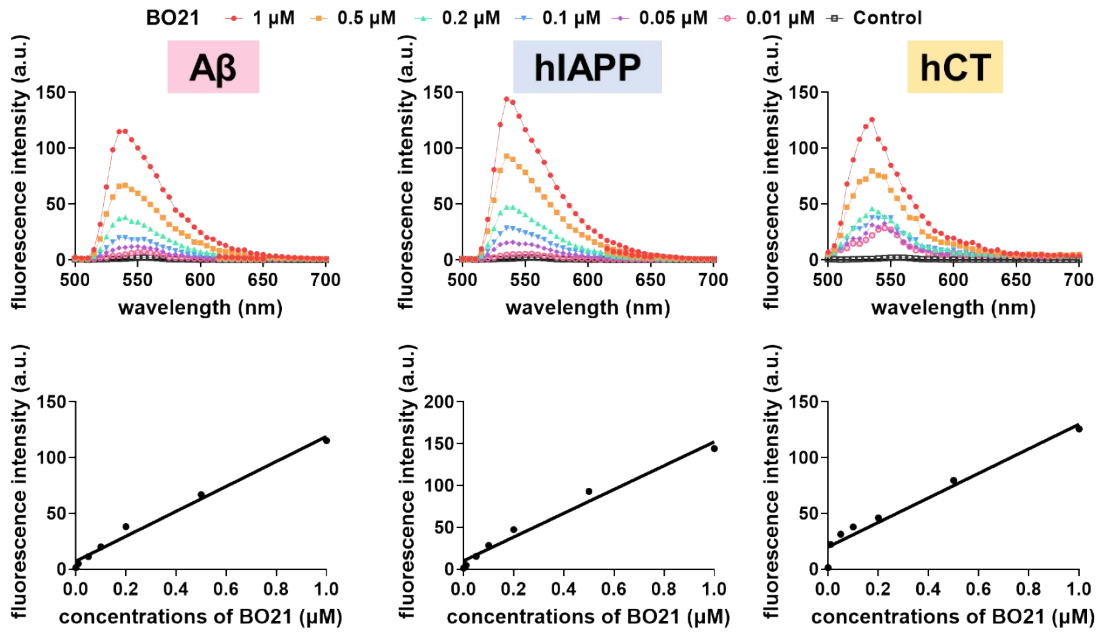

**Figure S5.** The fluorescence spectrum (1st column) and corresponding linear fitting analysis (2nd column) of 20  $\mu\text{M}$  A $\beta$  (1st column), hIAPP (2nd column), and hCT (3rd column) by stepwise addition of BO21 (0.01 to 1  $\mu\text{M}$ ) in PBS buffer (pH = 7.4).  $\lambda_{\text{ex}} = 470$  nm.

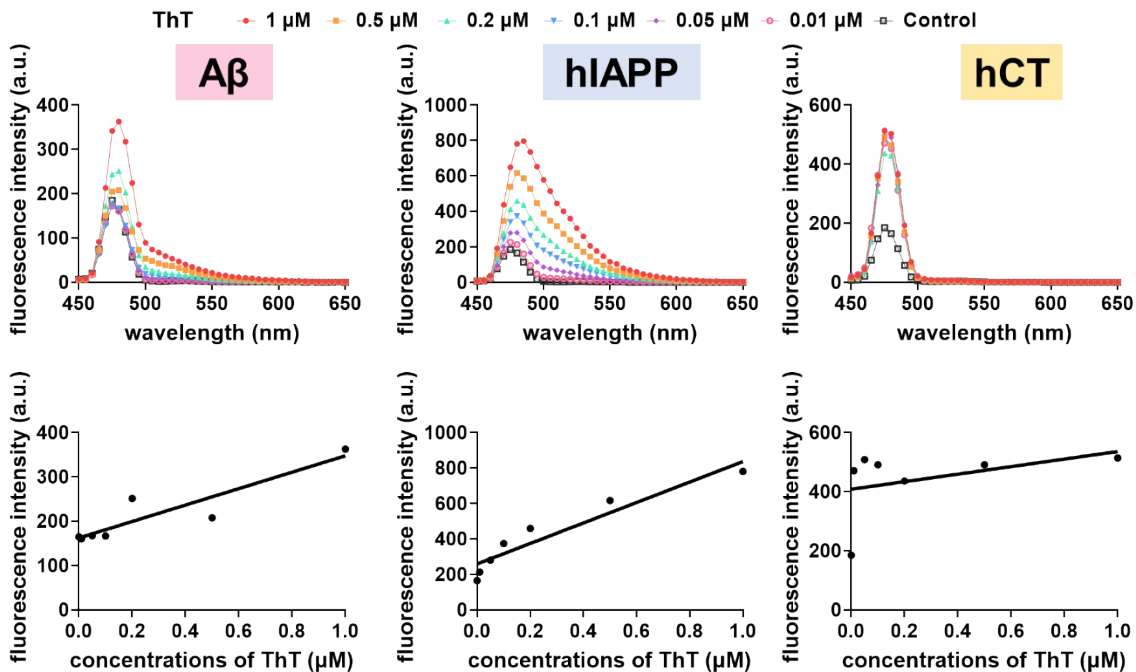

**Figure S6.** The fluorescence spectrum (1st column) and corresponding linear fitting analysis (2nd column) of 20  $\mu$ M A $\beta$  (1st column), hIAPP (2nd column), and hCT (3rd column) by stepwise addition of ThT (0.01 to 1  $\mu$ M) in PBS buffer (pH = 7.4).  $\lambda_{\text{exc}} = 450$  nm.

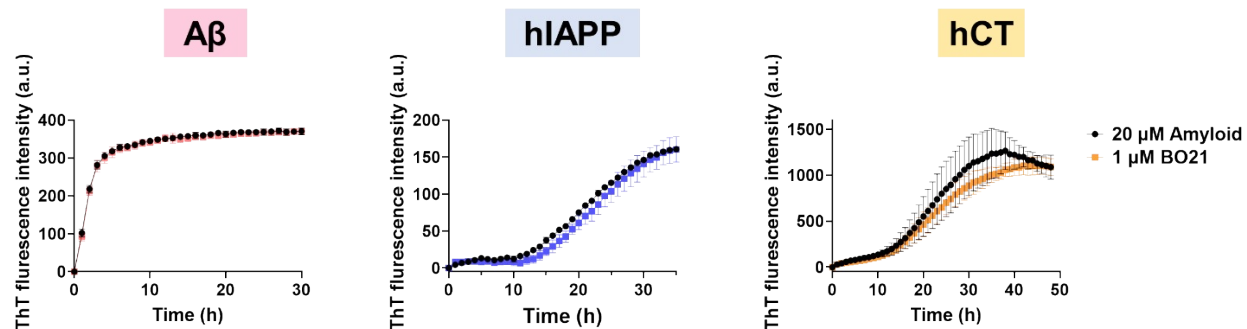

**Figure S7.** Time-dependent ThT fluorescence curves to monitor the aggregation kinetics of 20  $\mu$ M pure amyloid peptides of A $\beta$ , hIAPP, and hCT with and without 1  $\mu$ M BO21.

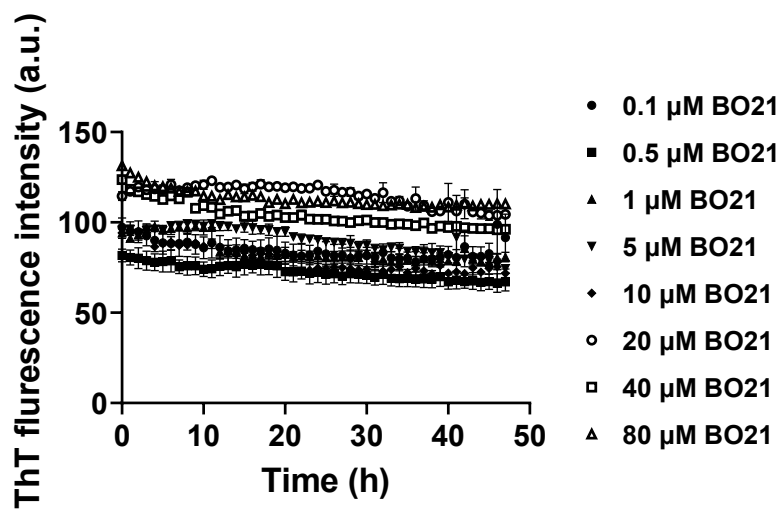

**Figure S8.** Time-dependent ThT fluorescence curves to monitor the aggregation kinetics of pure BO21 at different concentrations of 0.1-80  $\mu\text{M}$ .

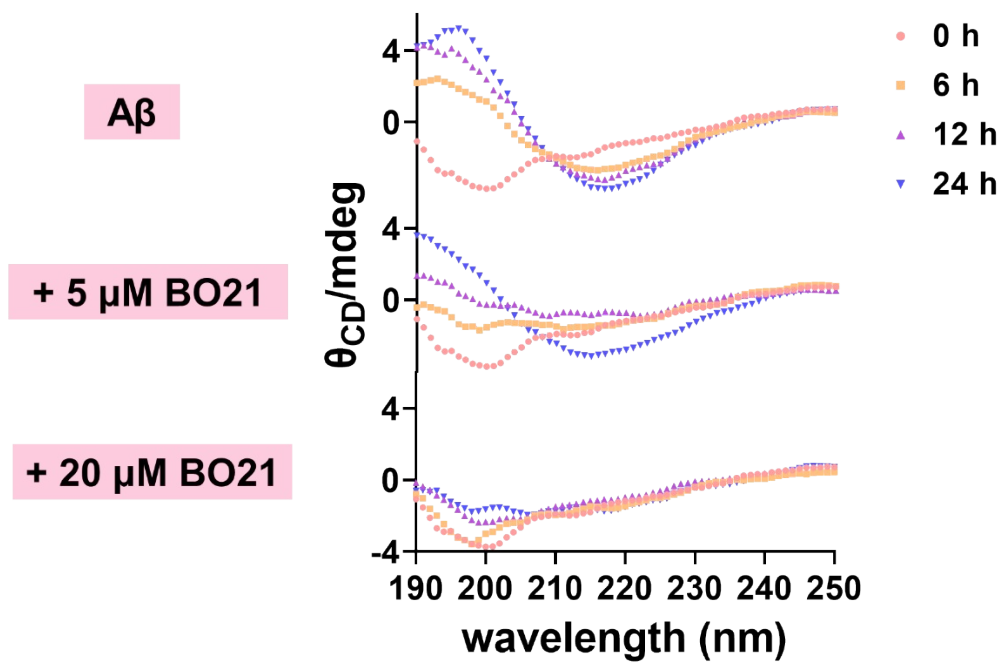

**Figure S9.** Time-dependent circular dichroism spectra for monitoring the secondary structure changes by adding 5-20  $\mu$ M BO21 to freshly prepared A $\beta$ .

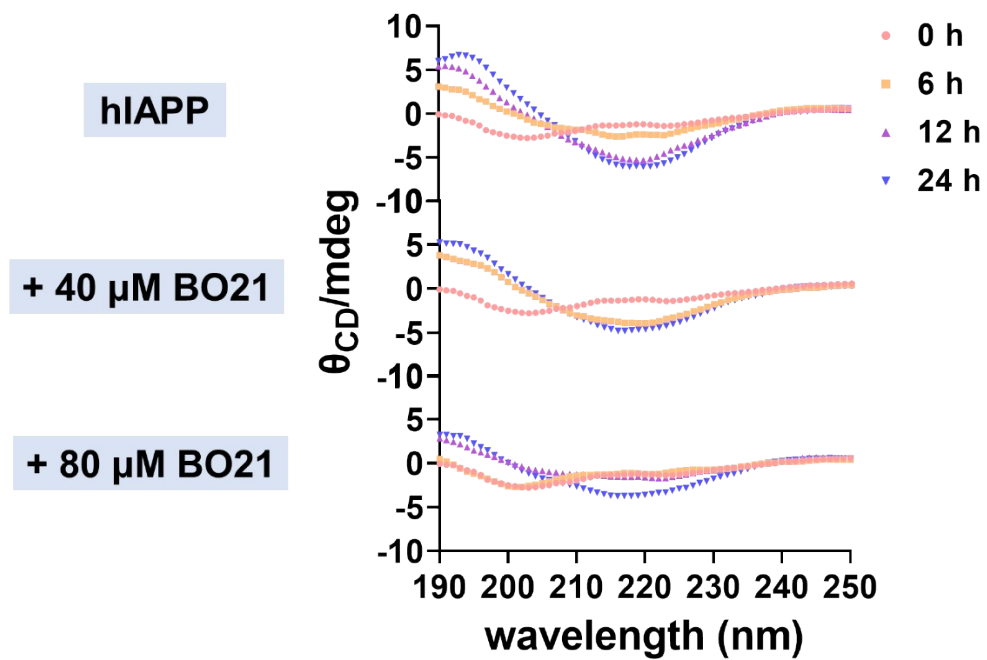

**Figure S10.** Time-dependent circular dichroism spectra for monitoring the secondary structure changes by adding 20-80  $\mu$ M BO21 to freshly prepared hIAPP.

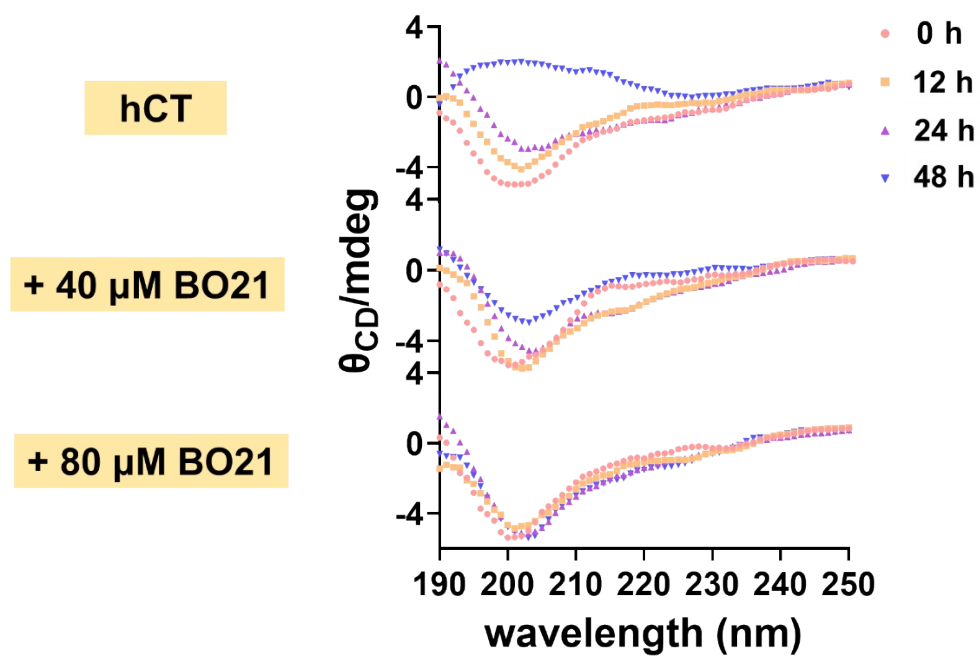

**Figure S11.** Time-dependent circular dichroism spectra for monitoring the secondary structure changes by adding 20-80  $\mu$ M BO21 to freshly prepared hCT.



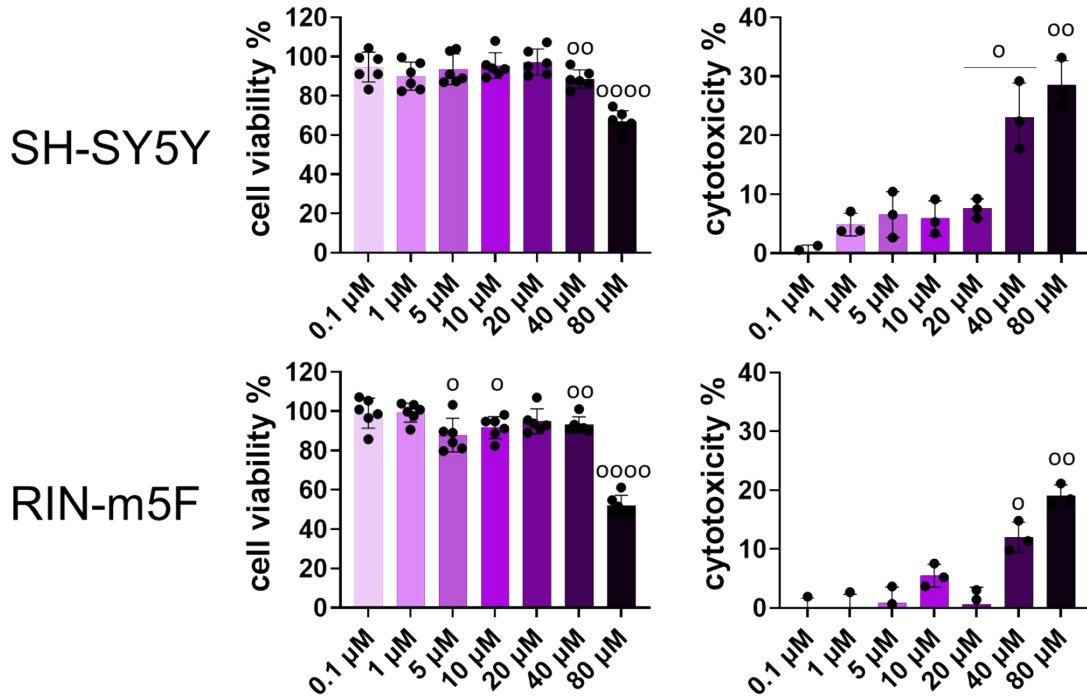

**Figure S12.** MTT reduction assay for cell viability (1st column) and LDH activity assay for cytotoxicity (2nd column) in the presence of different concentrations of BO21 from 0.1 to 80 μM. t-test was used for data analysis for cells treated with amyloids relative to untreated cell groups (n>3). (°p < 0.05, °°p < 0.01, °°°p < 0.005, °°°°p < 0.001).

## Reference

- (1) Mora, A. K.; Singh, P. K.; Patro, B. S.; Nath, S. PicoGreen: a better amyloid probe than Thioflavin-T. *Chemical Communications* **2016**, 52 (82), 12163.
- (2) Mudliar, N. H.; Singh, P. K. A molecular rotor-based turn-on sensor probe for amyloid fibrils in the extreme near-infrared region. *Chemical Communications* **2019**, 55 (27), 3907.
- (3) Benzeid, H.; Mothes, E.; Essassi, E. M.; Faller, P.; Pratviel, G. A thienoquinoxaline and a styryl-quinoxaline as new fluorescent probes for amyloid- $\beta$  fibrils. *Comptes Rendus Chimie* **2012**, 15 (1), 79.
- (4) Dyrager, C.; Vieira, R. P.; Nyström, S.; Nilsson, K. P. R.; Storr, T. Synthesis and evaluation of benzothiazole-triazole and benzothiadiazole-triazole scaffolds as potential molecular probes for amyloid- $\beta$  aggregation. *New Journal of Chemistry* **2017**, 41 (4), 1566.
- (5) Mu, X.; Wu, F.; Wang, R.; Huang, Z.; Lv, T.; Lu, Y.; Liu, B.; Zhou, X. A cyanine-derived NIR molecular rotor for ratiometric imaging of amyloid- $\beta$  aggregates. *Sensors Actuators B: Chemical* **2021**, 338, 129842.
- (6) Yue, N.; Fu, H.; Chen, Y.; Gao, X.; Dai, J.; Cui, M. Rational design of molecular rotor-based fluorescent probes with bi-aromatic rings for efficient in vivo detection of amyloid- $\beta$  plaques in Alzheimer's disease. *European Journal of Medicinal Chemistry* **2022**, 243, 114715.
- (7) Chang, W. M.; Dakanali, M.; Capule, C. C.; Sigurdson, C. J.; Yang, J.; Theodorakis, E. A. ANCA: a family of fluorescent probes that bind and stain amyloid plaques in human tissue. *ACS chemical neuroscience* **2011**, 2 (5), 249.
- (8) Sulatsky, M.; Sulatskaya, A.; Povarova, O.; Antifeeva, I. A.; Kuznetsova, I.; Turoverov, K. Effect of the fluorescent probes ThT and ANS on the mature amyloid fibrils. *Prion* **2020**, 14 (1), 67.
- (9) Ghadami, S. A.; Ahadi-Amandi, K.; Khodarahmi, R.; Ghanbari, S.; Adibi, H. Synthesis of benzylidene-indandione derivatives as quantification of amyloid fibrils. *Biophysical chemistry* **2023**, 296, 106982.
- (10) Klunk, W. E.; Wang, Y.; Huang, G.-f.; Debnath, M. L.; Holt, D. P.; Mathis, C. A. Uncharged thioflavin-T derivatives bind to amyloid-beta protein with high affinity and readily enter the brain. *Life sciences* **2001**, 69 (13), 1471.
- (11) Mudliar, N. H.; Sadhu, B.; Pettiwala, A. M.; Singh, P. K. Evaluation of an ultrafast molecular rotor, auramine O, as a fluorescent amyloid marker. *The Journal of Physical Chemistry B* **2016**, 120 (40), 10496.
- (12) Amdursky, N.; Huppert, D. Auramine-O as a fluorescence marker for the detection of amyloid fibrils. *The Journal of Physical Chemistry B* **2012**, 116 (45), 13389.
- (13) Wang, Y.-L.; Fan, C.; Xin, B.; Zhang, J.-P.; Luo, T.; Chen, Z.-Q.; Zhou, Q.-Y.; Yu, Q.; Li, X.-N.; Huang, Z.-L. et al. AIE-based super-resolution imaging probes for  $\beta$ -amyloid plaques in mouse brains. *Materials Chemistry Frontiers* **2018**, 2 (8), 1554.
- (14) Leung, C. W. T.; Guo, F.; Hong, Y.; Zhao, E.; Kwok, R. T. K.; Leung, N. L. C.; Chen, S.; Vaikath, N. N.; El-Agnaf, O. M.; Tang, Y. Detection of oligomers and fibrils of  $\alpha$ -synuclein by AIEgen with strong fluorescence. *Chemical Communications* **2015**, 51 (10), 1866.

- (15) Das, A.; Gupta, A.; Hong, Y.; Carver, J. A.; Maiti, S. A Spectroscopic Marker for Structural Transitions Associated with Amyloid- $\beta$  Aggregation. *Biochemistry* **2020**, *59* (19), 1813.
- (16) Kumar, M.; Hong, Y.; Thorn, D. C.; Ecroyd, H.; Carver, J. A. Monitoring early-stage protein aggregation by an aggregation-induced emission fluorogen. *Analytical chemistry* **2017**, *89* (17), 9322.
- (17) Aarabi, M. H.; Mirhashemi, S. M. To estimate effective antiamyloidogenic property of melatonin and fisetin and their actions to destabilize amyloid fibrils. *Pak J Pharm Sci* **2017**, *30* (5), 1589.
- (18) Dubey, R.; Patil, K.; Dantu, S. C.; Sardesai, D. M.; Bhatia, P.; Malik, N.; Acharya, J. D.; Sarkar, S.; Ghosh, S.; Chakrabarti, R. Azadirachtin inhibits amyloid formation, disaggregates pre-formed fibrils and protects pancreatic  $\beta$ -cells from human islet amyloid polypeptide/amylin-induced cytotoxicity. *Biochemical Journal* **2019**, *476* (5), 889.
- (19) Török, M.; Abid, M.; Mhadgut, S. C.; Török, B. Organofluorine inhibitors of amyloid fibrillogenesis. *Biochemistry* **2006**, *45* (16), 5377.
- (20) Fortin, J. S.; Benoit-Biancamano, M.-O. In vitro evaluation of hypoglycemic agents to target human islet amyloid polypeptide: a key protein involved in amyloid deposition and beta-cell loss. *Canadian journal of diabetes* **2015**, *39* (5), 373.
- (21) Xu, Z.-X.; Zhang, Q.; Ma, G.-L.; Chen, C.-H.; He, Y.-M.; Xu, L.-H.; Zhang, Y.; Zhou, G.-R.; Li, Z.-H.; Yang, H.-J. Influence of aluminium and EGCG on fibrillation and aggregation of human islet amyloid polypeptide. *Journal of diabetes research* **2016**, *2016*.
- (22) Ehrnhoefer, D. E.; Duennwald, M.; Markovic, P.; Wacker, J. L.; Engemann, S.; Roark, M.; Legleiter, J.; Marsh, J. L.; Thompson, L. M.; Lindquist, S. Green tea (–)-epigallocatechin-gallate modulates early events in huntingtin misfolding and reduces toxicity in Huntington's disease models. *Human molecular genetics* **2006**, *15* (18), 2743.
- (23) Ferreira, N.; Saraiva, M. J.; Almeida, M. R. Natural polyphenols inhibit different steps of the process of transthyretin (TTR) amyloid fibril formation. *FEBS letters* **2011**, *585* (15), 2424.
- (24) Wobst, H. J.; Sharma, A.; Diamond, M. I.; Wanker, E. E.; Bieschke, J. The green tea polyphenol (–)-epigallocatechin gallate prevents the aggregation of tau protein into toxic oligomers at substoichiometric ratios. *FEBS letters* **2015**, *589* (1), 77.
- (25) Ren, B.; Liu, Y.; Zhang, Y.; Cai, Y.; Gong, X.; Chang, Y.; Xu, L.; Zheng, J. Genistein: a dual inhibitor of both amyloid  $\beta$  and human islet amylin peptides. *ACS chemical neuroscience* **2018**, *9* (5), 1215.
- (26) Mishra, R.; Sellin, D.; Radovan, D.; Gohlke, A.; Winter, R. Inhibiting islet amyloid polypeptide fibril formation by the red wine compound resveratrol. *ChemBioChem* **2009**, *10* (3), 445.
- (27) Alam, P.; Chaturvedi, S. K.; Siddiqi, M. K.; Rajpoot, R. K.; Ajmal, M. R.; Zaman, M.; Khan, R. H. Vitamin k3 inhibits protein aggregation: implication in the treatment of amyloid diseases. *Scientific reports* **2016**, *6* (1), 1.
- (28) Ono, K.; Yoshiike, Y.; Takashima, A.; Hasegawa, K.; Naiki, H.; Yamada, M. Potent anti-amyloidogenic and fibril-destabilizing effects of polyphenols in vitro: implications for the prevention and therapeutics of Alzheimer's disease. *Journal of neurochemistry* **2003**, *87* (1), 172.
- (29) Noor, H.; Cao, P.; Raleigh, D. P. Morin hydrate inhibits amyloid formation by islet amyloid polypeptide and disaggregates amyloid fibers. *Protein Science* **2012**, *21* (3), 373.

- (30) Patel, P.; Parmar, K.; Das, M. Inhibition of insulin amyloid fibrillation by Morin hydrate. *International journal of biological macromolecules* **2018**, *108*, 225.
- (31) López, L. C.; Varea, O.; Navarro, S.; Carrodegua, J. A.; Sanchez de Groot, N.; Ventura, S.; Sancho, J. Benzobromarone, quercetin, and folic acid inhibit amylin aggregation. *International journal of molecular sciences* **2016**, *17* (6), 964.
- (32) Zhu, M.; Han, S.; Fink, A. L. Oxidized quercetin inhibits  $\alpha$ -synuclein fibrillization. *Biochimica et Biophysica Acta (BBA)-General Subjects* **2013**, *1830* (4), 2872.
- (33) Kumar, S.; Krishnakumar, V. G.; Morya, V.; Gupta, S.; Datta, B. Nanobiocatalyst facilitated aglycosidic quercetin as a potent inhibitor of tau protein aggregation. *International journal of biological macromolecules* **2019**, *138*, 168.
- (34) Aarabi, M.-H.; Mirhashemi, S. M. The role of two natural flavonoids on human amylin aggregation. *African Journal of Pharmacy and Pharmacology* **2012**, *6* (31), 2374.
- (35) Ono, K.; Yamada, M. Antioxidant compounds have potent anti-fibrillogenic and fibril-destabilizing effects for  $\alpha$ -synuclein fibrils in vitro. *Journal of neurochemistry* **2006**, *97* (1), 105.
- (36) Taniguchi, S.; Suzuki, N.; Masuda, M.; Hisanaga, S.-i.; Iwatsubo, T.; Goedert, M.; Hasegawa, M. Inhibition of heparin-induced tau filament formation by phenothiazines, polyphenols, and porphyrins. *Journal of Biological Chemistry* **2005**, *280* (9), 7614.
- (37) Aitken, J. F.; Loomes, K. M.; Riba-Garcia, I.; Unwin, R. D.; Prijic, G.; Phillips, A. S.; Phillips, A. R.; Wu, D.; Poppitt, S. D.; Ding, K. Rutin suppresses human-amylin/hIAPP misfolding and oligomer formation in-vitro, and ameliorates diabetes and its impacts in human-amylin/hIAPP transgenic mice. *Biochemical and biophysical research communications* **2017**, *482* (4), 625.
- (38) Yu, X.-L.; Li, Y.-N.; Zhang, H.; Su, Y.-J.; Zhou, W.-W.; Zhang, Z.-P.; Wang, S.-W.; Xu, P.-X.; Wang, Y.-J.; Liu, R.-T. Rutin inhibits amylin-induced neurocytotoxicity and oxidative stress. *Food & Function* **2015**, *6* (10), 3296.
- (39) Wang, S.-w.; Wang, Y.-J.; Su, Y.-j.; Zhou, W.-w.; Yang, S.-g.; Zhang, R.; Zhao, M.; Li, Y.-n.; Zhang, Z.-p.; Zhan, D.-w. Rutin inhibits  $\beta$ -amyloid aggregation and cytotoxicity, attenuates oxidative stress, and decreases the production of nitric oxide and proinflammatory cytokines. *Neurotoxicology* **2012**, *33* (3), 482.
- (40) Daval, M.; Bedrood, S.; Gurlo, T.; Huang, C.-J.; Costes, S.; Butler, P. C.; Langen, R. The effect of curcumin on human islet amyloid polypeptide misfolding and toxicity. *Amyloid* **2010**, *17* (3-4), 118.
- (41) Sparks, S.; Liu, G.; Robbins, K. J.; Lazo, N. D. Curcumin modulates the self-assembly of the islet amyloid polypeptide by disassembling  $\alpha$ -helix. *Biochemical and biophysical research communications* **2012**, *422* (4), 551.
- (42) Yang, F.; Lim, G. P.; Begum, A. N.; Ubeda, O. J.; Simmons, M. R.; Ambegaokar, S. S.; Chen, P. P.; Kaye, R.; Glabe, C. G.; Frautschy, S. A. Curcumin inhibits formation of amyloid  $\beta$  oligomers and fibrils, binds plaques, and reduces amyloid in vivo. *Journal of Biological Chemistry* **2005**, *280* (7), 5892.
- (43) Pandey, N.; Strider, J.; Nolan, W. C.; Yan, S. X.; Galvin, J. E. Curcumin inhibits aggregation of  $\alpha$ -synuclein. *Acta neuropathologica* **2008**, *115* (4), 479.
- (44) Caughey, B.; Raymond, L. D.; Raymond, G. J.; Maxson, L.; Silveira, J.; Baron, G. S. Inhibition of protease-resistant prion protein accumulation in vitro by curcumin. *Journal of virology* **2003**, *77* (9), 5499.

- (45) Yin, F.; Liu, J.; Ji, X.; Wang, Y.; Zidichouski, J.; Zhang, J. Silibinin: A novel inhibitor of A $\beta$  aggregation. *Neurochemistry international* **2011**, *58* (3), 399.
- (46) Cheng, B.; Liu, X.; Gong, H.; Huang, L.; Chen, H.; Zhang, X.; Li, C.; Yang, M.; Ma, B.; Jiao, L. Coffee components inhibit amyloid formation of human islet amyloid polypeptide in vitro: possible link between coffee consumption and diabetes mellitus. *Journal of agricultural food chemistry* **2011**, *59* (24), 13147.
- (47) Sharma, B.; Paul, S. Action of caffeine as an amyloid inhibitor in the aggregation of A $\beta$ 16–22 peptides. *The Journal of Physical Chemistry B* **2016**, *120* (34), 9019.
- (48) Hong, Y.; Meng, L.; Chen, S.; Leung, C. W. T.; Da, L.-T.; Faisal, M.; Silva, D.-A.; Liu, J.; Lam, J. W. Y.; Huang, X. Monitoring and inhibition of insulin fibrillation by a small organic fluorogen with aggregation-induced emission characteristics. *Journal of the American Chemical Society* **2012**, *134* (3), 1680.
- (49) Groenning, M. Binding mode of Thioflavin T and other molecular probes in the context of amyloid fibrils—current status. *Journal of chemical biology* **2010**, *3*, 1.
- (50) Lorenzo, A.; Yankner, B. A. Beta-amyloid neurotoxicity requires fibril formation and is inhibited by congo red. *Proceedings of the National Academy of Sciences* **1994**, *91* (25), 12243.
- (51) Pandey, S. P.; Singh, P. K. Basic Orange 21: a molecular rotor probe for fluorescence turn-on sensing of amyloid fibrils. *Journal of Molecular Liquids* **2020**, *303*, 112618.
